# Supplementary material for: Carbon Monoxide Releasing Molecule‐3 Enhances Heme Oxygenase‐1 Induction via ROS‐Dependent FoxO1 and Nrf2 in Brain Astrocytes
Source: Hindawi journal article supplement (doi:10.1155/2021/5521196), 2021-01-01
Supplement: f1 [file 5521196.f1.pdf]

## Supplementary Figure 1.

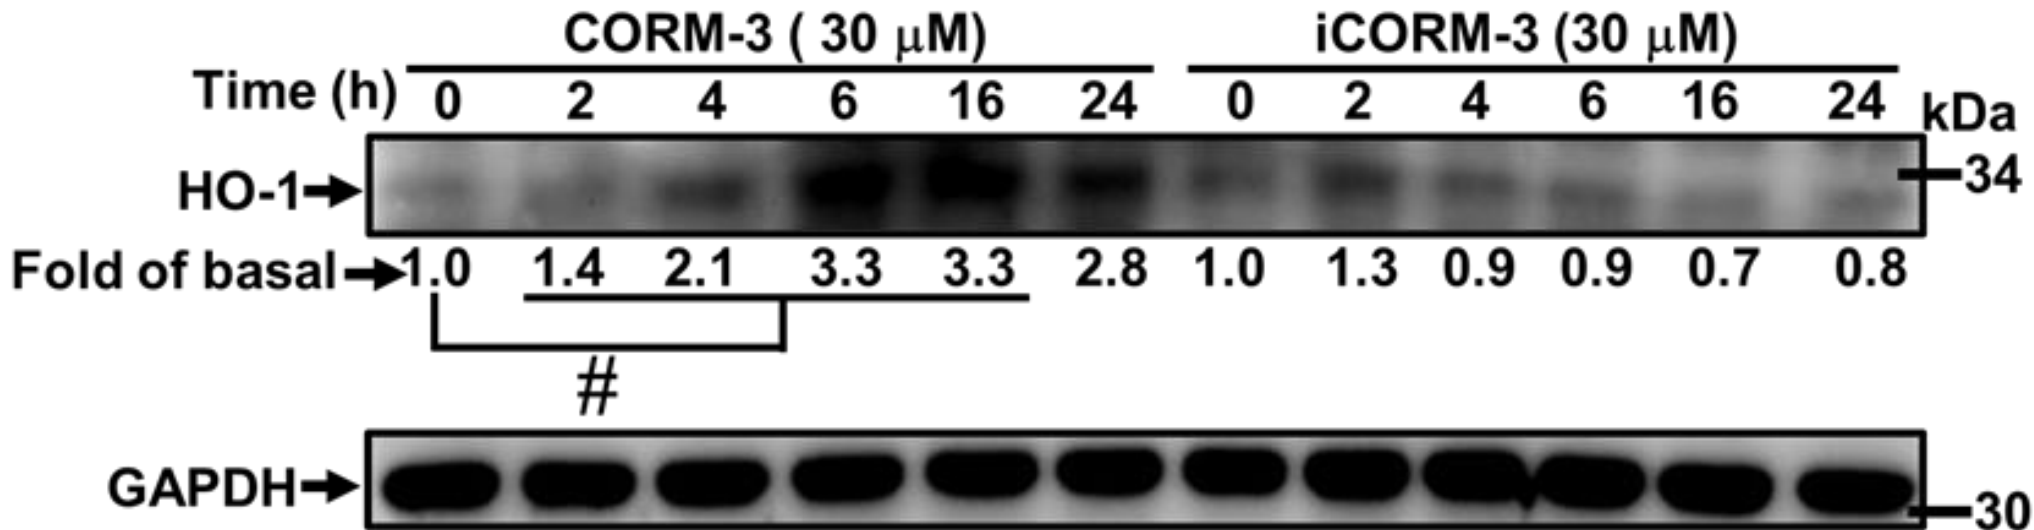

Supplementary Figure 1. RBA-1 cells were incubated with 30  $\mu$ M either CORM-3 or i-CORM-3 for the indicated time intervals and the levels of HO-1 were determined by western blot. # $p < 0.05$ , as compared with respective control.

## Supplementary Figure 2.

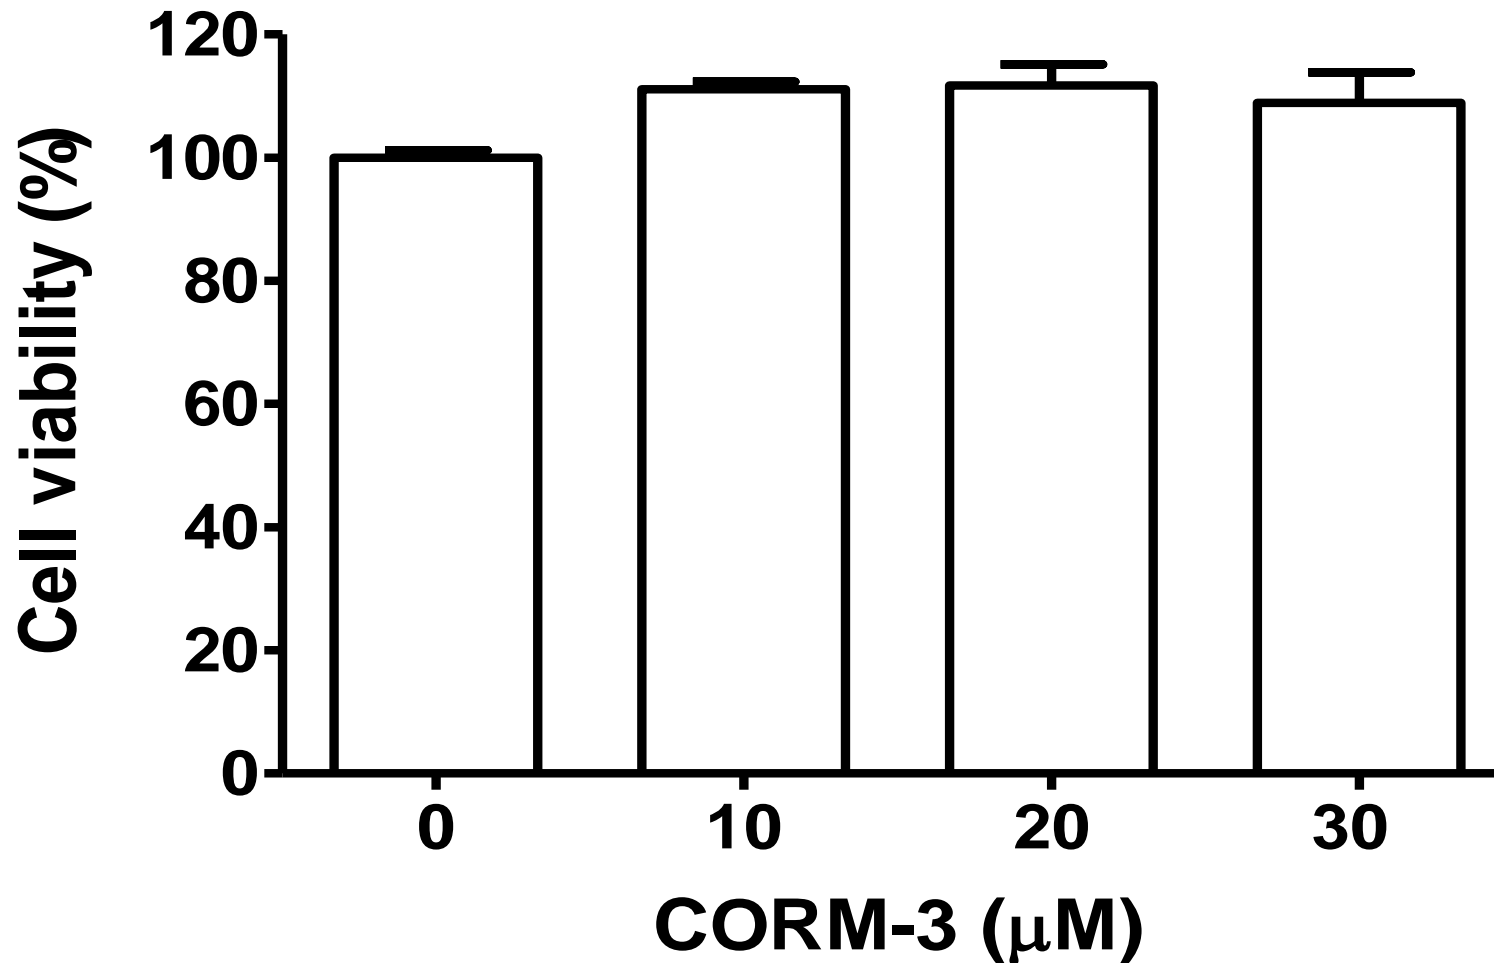

Supplementary Figure 2. RBA-1 cells were incubated with or without the indicated dosages (10, 20, 30 μM) of CORM-3 for 24 h and the levels of cell viability were determined by an XTT assay.
